# Supplementary material
Source: Springer Nature journal article supplement (https://www.springermedizin.de/resource/supplementary/12968_2011_2569_MOESM5_ESM.pdf/9582254)

Temperature distribution with increasing tissue depth - measured at six power levels and with low contact force (10g)

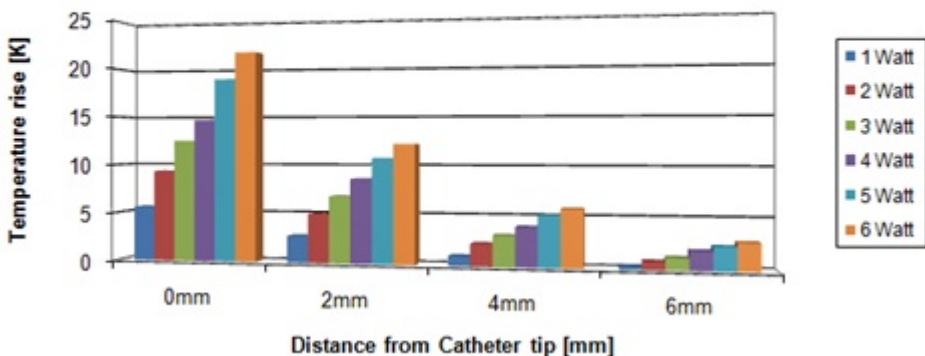

Temperature distribution with increasing tissue depth - measured at six power levels and with high contact force (90g)

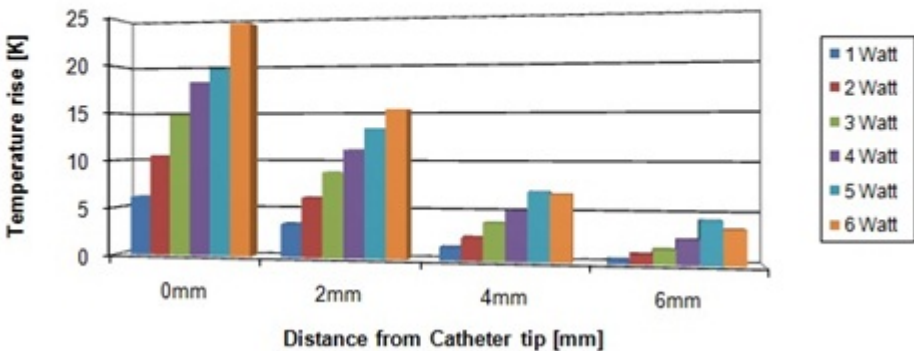

Supplement: MOESM5 [file 9582254]
